# Supplementary material for: Molecular Evolution and Structural Mapping of N-Terminal Domain in Spike Gene of Middle East Respiratory Syndrome Coronavirus (MERS-CoV)
Source: PubMed Central journal article supplement (PMC7290774; doi:10.3390/v12050502), 2020-05-02
Supplement: viruses-12-00502-s001.pdf [file viruses-12-00502-s001.pdf]

Table: Geographical and temporal distribution of 160 MERS-CoV isolates used for phylogenetic analysis.

| <b>Serial</b> | <b>Genbank Accession No.</b> | <b>Country</b>       | <b>Year of Isolation</b> |
|---------------|------------------------------|----------------------|--------------------------|
| 1             | JX869059                     | The Netherlands      | 2012                     |
| 2             | MN735679                     | Saudi Arabia         | 2015                     |
| 3             | MN735680                     | Saudi Arabia         | 2016                     |
| 4             | MN735681                     | Saudi Arabia         | 2017                     |
| 5             | MN735682                     | Saudi Arabia         | 2017                     |
| 6             | MK858156                     | Saudi Arabia         | 2016                     |
| 7             | MK858157                     | Saudi Arabia         | 2016                     |
| 8             | MK858158                     | Saudi Arabia         | 2016                     |
| 9             | MK858159                     | Saudi Arabia         | 2016                     |
| 10            | MK858160                     | Saudi Arabia         | 2017                     |
| 11            | MK858161                     | Saudi Arabia         | 2017                     |
| 12            | MK858162                     | Saudi Arabia         | 2017                     |
| 13            | MK858163                     | Saudi Arabia         | 2017                     |
| 14            | MK858164                     | Saudi Arabia         | 2017                     |
| 15            | KT806006                     | Saudi Arabia         | 2015                     |
| 16            | KM027288                     | Saudi Arabia         | 2014                     |
| 17            | KT80597                      | Saudi Arabia         | 2015                     |
| 18            | KT861627                     | Jordan               | 2014                     |
| 19            | MG011342                     | Saudi Arabia         | 2016                     |
| 20            | KT868877                     | South Korea          | 2015                     |
| 21            | KT357811                     | Saudi Arabia         | 2014                     |
| 22            | KR912187                     | Saudi Arabia-        | 2014                     |
| 23            | KT156560                     | Oman                 | 2013                     |
| 24            | KJ156881                     | Saudi Arabia         | 2013                     |
| 25            | KT805992                     | Saudi Arabia         | 2015                     |
| 26            | KX154689                     | Saudi Arabia         | 2016                     |
| 27            | KF745068                     | France               | 2013                     |
| 28            | KT029139                     | South Korea          | 2015                     |
| 29            | MG011340                     | Saudi Arabia         | 2016                     |
| 30            | KM027279                     | Saudi Arabia         | 2014                     |
| 31            | MG011350                     | Saudi Arabia         | 2016                     |
| 32            | KM015348                     | United Kingdom       | 2013                     |
| 33            | KX154687                     | Saudi Arabia         | 2016                     |
| 34            | KT806010                     | Saudi Arabia         | 2015                     |
| 35            | MF741827                     | Jordan               | 2015                     |
| 36            | KJ782549                     | Greece               | 2014                     |
| 37            | KF192507                     | United Arab Emirates | 2013                     |
| 38            | MG912604                     | Saudi Arabia         | 2017                     |
| 39            | KT806021                     | Saudi Arabia         | 2015                     |
| 40            | KF600643                     | Saudi Arabia         | 2013                     |
| 41            | MG011357                     | Saudi Arabia         | 2016                     |
| 42            | KX154691                     | Saudi Arabia         | 2016                     |
| 43            | MG912606                     | Saudi Arabia         | 2017                     |
| 44            | KT121578                     | Saudi Arabia         | 2014                     |

| <b>Serial</b> | <b>Genbank Accession No.</b> | <b>Country</b>       | <b>Year of Isolation</b> |
|---------------|------------------------------|----------------------|--------------------------|
| 45            | KT805987                     | Saudi Arabia         | 2015                     |
| 46            | MG011358                     | Saudi Arabia         | 2016                     |
| 47            | KT121581                     | Saudi Arabia         | 2014                     |
| 48            | MG011359                     | Saudi Arabia         | 2016                     |
| 49            | MG011347                     | Saudi Arabia         | 2016                     |
| 50            | KP209307                     | United Arab Emirates | 2014                     |
| 51            | KT805973                     | Saudi Arabia         | 2015                     |
| 52            | KT003530                     | Saudi Arabia         | 2015                     |
| 53            | MG011344                     | Saudi Arabia         | 2016                     |
| 54            | KT326819                     | South Korea          | 2015                     |
| 55            | KT806011                     | Saudi Arabia         | 2015                     |
| 56            | MG011360                     | Saudi Arabia         | 2017                     |
| 57            | KF186566                     | Saudi Arabia         | 2013                     |
| 58            | KT805975                     | Saudi Arabia         | 2015                     |
| 59            | MH310909                     | Saudi Arabia         | 2017                     |
| 60            | KF600628                     | Saudi Arabia         | 2013                     |
| 61            | KM027262                     | Saudi Arabia         | 2014                     |
| 62            | KJ829365                     | USA                  | 2014                     |
| 63            | KP236092                     | United Arab Emirates | 2013                     |
| 64            | KT121579                     | Saudi Arabia         | 2014                     |
| 65            | KT805970                     | Saudi Arabia         | 2015                     |
| 66            | KT806016                     | Saudi Arabia         | 2015                     |
| 67            | KT806036                     | Saudi Arabia         | 2015                     |
| 68            | KT806049                     | Saudi Arabia         | 2015                     |
| 69            | KT868871                     | South Korea          | 2015                     |
| 70            | MG912607                     | Saudi Arabia         | 2017                     |
| 71            | MG011356                     | Saudi Arabia         | 2016                     |
| 72            | KT806054                     | Saudi Arabia         | 2015                     |
| 73            | KT805968                     | Saudi Arabia         | 2015                     |
| 74            | KF961221                     | Qatar                | 2013                     |
| 75            | KT182956                     | South Korea          | 2015                     |
| 76            | KJ156952                     | Saudi Arabia         | 2013                     |
| 77            | KT806055                     | Saudi Arabia         | 2015                     |
| 78            | KX034095                     | South Korea          | 2015                     |
| 79            | KJ361503                     | France               | 2013                     |
| 80            | KJ156944                     | Saudi Arabia         | 2013                     |
| 81            | MF741830                     | Jordan               | 2015                     |
| 82            | KT805981                     | Saudi Arabia         | 2015                     |
| 83            | KT806008                     | Saudi Arabia         | 2015                     |
| 84            | MG912597                     | Saudi Arabia         | 2017                     |
| 85            | KM027257                     | Saudi Arabia         | 2014                     |
| 86            | KX154693                     | Saudi Arabia         | 2016                     |
| 87            | KJ156876                     | Saudi Arabia         | 2013                     |
| 88            | KT806037                     | Saudi Arabia         | 2015                     |
| 89            | KT805966                     | Saudi Arabia         | 2015                     |
| 90            | KJ361499                     | France               | 2013                     |
| 91            | MG912609                     | Saudi Arabia         | 2017                     |
| 92            | KT374057                     | South Korea          | 2015                     |
| 93            | KY581694                     | United Arab Emirates | 2014                     |
| 94            | KM027268                     | Saudi Arabia         | 2014                     |
| 95            | KM027274                     | Saudi Arabia         | 2014                     |
| 96            | MH310912                     | Saudi Arabia         | 2017                     |

| <b>Serial</b> | <b>Genbank Accession No.</b> | <b>Country</b>       | <b>Year of Isolation</b> |
|---------------|------------------------------|----------------------|--------------------------|
| 97            | KT806020                     | Saudi Arabia         | 2015                     |
| 98            | MG757605                     | Saudi Arabia         | 2016                     |
| 99            | KP209310                     | United Arab Emirates | 2014                     |
| 100           | MG757597                     | Saudi Arabia         | 2015                     |
| 101           | KF600613                     | Saudi Arabia         | 2013                     |
| 102           | KT805994                     | Saudi Arabia         | 2015                     |
| 103           | KF600620                     | Saudi Arabia         | 2012                     |
| 104           | MG011354                     | Saudi Arabia         | 2016                     |
| 105           | KT805988                     | Saudi Arabia         | 2015                     |
| 106           | KT225476                     | Thailand             | 2015                     |
| 107           | KT806003                     | Saudi Arabia         | 2015                     |
| 108           | KF600626                     | Saudi Arabia         | 2013                     |
| 109           | KF600634                     | Saudi Arabia         | 2013                     |
| 110           | KT806038                     | Saudi Arabia         | 2015                     |
| 111           | KT806041                     | Saudi Arabia         | 2015                     |
| 112           | KF811036                     | Tunisia              | 2013                     |
| 113           | KM027277                     | Saudi Arabia         | 2014                     |
| 114           | KM027285                     | Saudi Arabia         | 2014                     |
| 115           | KT806028                     | Saudi Arabia         | 2015                     |
| 116           | MG520075                     | Saudi Arabia         | 2015                     |
| 117           | MH454272                     | Saudi Arabia         | 2016                     |
| 118           | KR912188                     | Saudi Arabia         | 2014                     |
| 119           | KT357810                     | Saudi Arabia         | 2014                     |
| 120           | MG546330                     | Saudi Arabia         | 2015                     |
| 121           | KT805983                     | Saudi Arabia         | 2015                     |
| 122           | KT805991                     | Saudi Arabia         | 2015                     |
| 123           | KM210277                     | United Kingdom       | 2013                     |
| 124           | KX154685                     | Saudi Arabia         | 2016                     |
| 125           | KT868872                     | South Korea          | 2015                     |
| 126           | KY673148                     | Oman                 | 2015                     |
| 127           | KR011266                     | Saudi Arabia         | 2014                     |
| 128           | KM027276                     | Saudi Arabia         | 2014                     |
| 129           | KF600652                     | Saudi Arabia         | 2012                     |
| 130           | KM027286                     | Saudi Arabia         | 2014                     |
| 131           | KC776174                     | Jordan               | 2012                     |
| 132           | KJ361502                     | France               | 2013                     |
| 133           | KY581684                     | United Arab Emirates | 2013                     |
| 134           | KT374051                     | South Korea          | 2015                     |
| 135           | KT806015                     | Saudi Arabia         | 2015                     |
| 136           | KT861632                     | Jordan               | 2014                     |
| 137           | KT374056                     | South Korea          | 2015                     |
| 138           | KT806022                     | Saudi Arabia         | 2015                     |
| 139           | KJ156905                     | Saudi Arabia         | 2013                     |
| 140           | KT806032                     | Saudi Arabia         | 2015                     |
| 141           | KR912196                     | Saudi Arabia         | 2014                     |
| 142           | KX034097                     | South Korea          | 2015                     |
| 143           | KM027284                     | Saudi Arabia         | 2014                     |
| 144           | MG366881                     | Saudi Arabia         | 2015                     |
| 145           | KT156561                     | Oman                 | 2013                     |
| 146           | KX154694                     | Saudi Arabia         | 2016                     |
| 147           | KJ156936                     | Saudi Arabia         | 2013                     |
| 148           | KM027273                     | Saudi Arabia         | 2014                     |

| <b>Serial</b> | <b>Genbank Accession No.</b> | <b>Country</b> | <b>Year of Isolation</b> |
|---------------|------------------------------|----------------|--------------------------|
| 149           | KJ156911                     | Saudi Arabia   | 2013                     |
| 150           | KJ156869                     | Saudi Arabia   | 2013                     |
| 151           | MG011362                     | Saudi Arabia   | 2016                     |
| 152           | KC164505                     | United Kingdom | 2012                     |
| 153           | KX154690                     | Saudi Arabia   | 2016                     |
| 154           | KX034093                     | South Korea    | 2015                     |
| 155           | KT805976                     | Saudi Arabia   | 2015                     |
| 156           | KF600630                     | Saudi Arabia   | 2015                     |
| 157           | KJ361501                     | France         | 2013                     |
| 158           | KX154692                     | Saudi Arabia   | 2016                     |
| 159           | KR912191                     | Saudi Arabia   | 2014                     |
| 160           | MH395139                     | Saudi Arabia   | 2016                     |
